# Supplementary material for: Nutrient Stress–Dysregulated Antisense lncRNA GLS-AS Impairs GLS-Mediated Metabolism and Represses Pancreatic Cancer Progression
Source: Oxford University Press journal article supplement (doi:10.1158/0008-5472.can-18-0419), 2018-12-18
Supplement: 00085472can180419-sup-196810_3_supp_5171487_plldbx.docx [file 00085472can180419-sup-196810_3_supp_5171487_plldbx.docx]

Supplementary Table 1: Correlation between GLS-AS expression and clinical characteristicsof patient with pancreatic cancer.

| Characteristics | Number of cases | GLS-AS expression | | P value |
| --- | --- | --- | --- | --- |
| High | low |
| Total cases | 30 | 15 | 15 |  |
| Gender |  |  |  |  |
| Male | 21 | 11 | 10 | 0.690 |
| Female | 9 | 4 | 5 |  |
| Age |  |  |  |  |
| <60 | 22 | 12 | 10 | 0.409 |
| ≥60 | 8 | 3 | 5 |  |
| Tumor size(cm) |  |  |  |  |
| <2 | 13 | 10 | 3 | 0.010 |
| ≥2 | 17 | 5 | 12 |  |
| Histological Grade |  |  |  |  |
| High/Moderate | 23 | 12 | 11 | 0.666 |
| Low | 7 | 3 | 4 |  |
| Lymphatic invasion |  |  |  |  |
| Positive | 19 | 13 | 6 | 0.008 |
| Negative | 11 | 2 | 9 |  |
| Vascular invasion |  |  |  |  |
| Positive | 17 | 5 | 12 | 0.010 |
| Negative | 13 | 10 | 3 |  |
| Distant Metastasis |  |  |  |  |
| Positive | 10 | 2 | 8 | 0.020 |
| Negative | 20 | 13 | 7 |  |
